# Supplementary material for: Zika virus infection reprograms global transcription of host cells to allow sustained infection
Source: PubMed Central journal article supplement (PMC5457678; doi:10.1038/emi.2017.9), 2017-04-26
Supplement: emi20179x1.pdf [file emi20179x1.pdf]

Figure S1

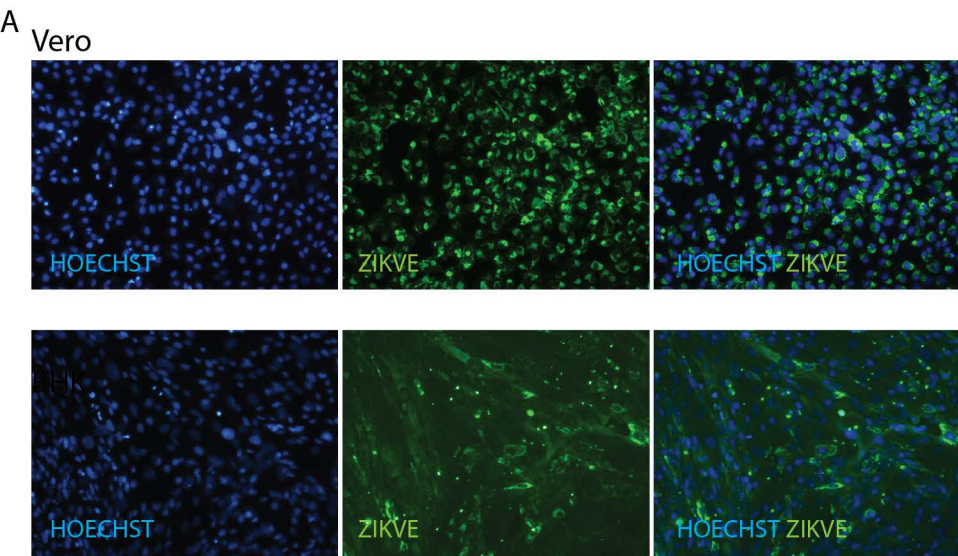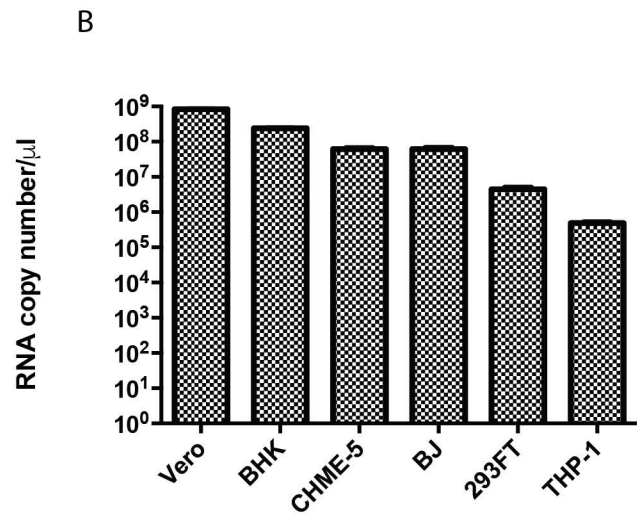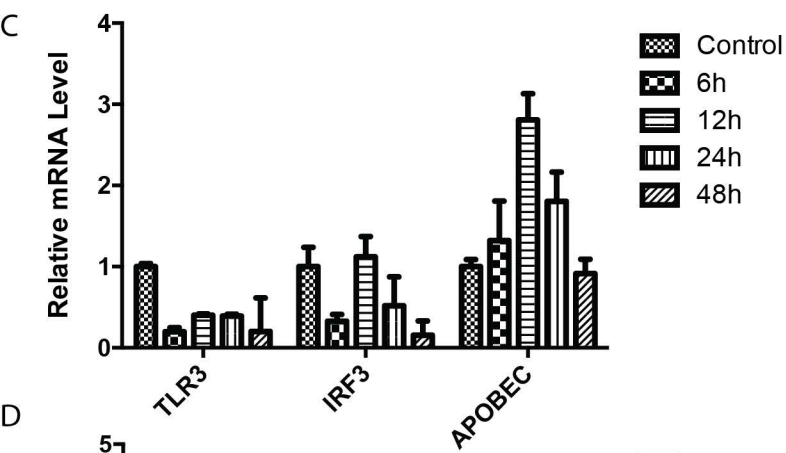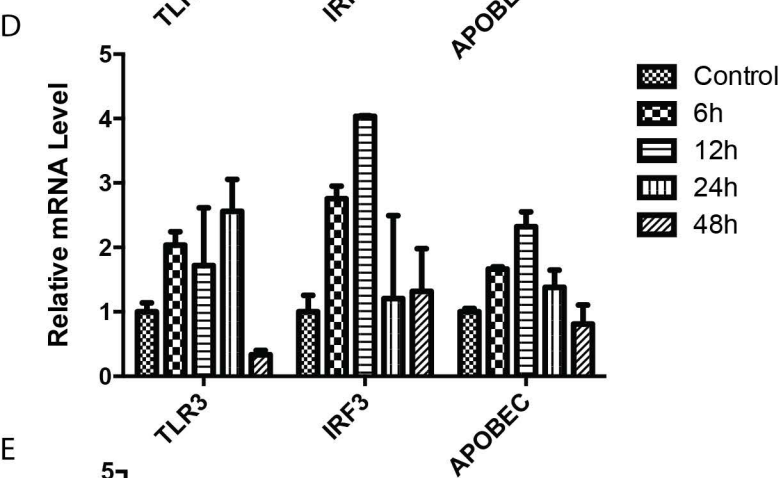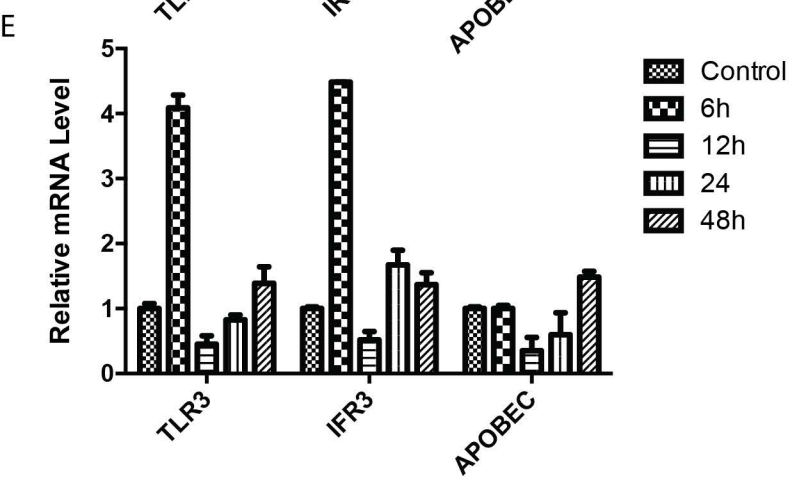

**Figure S1 Amplification of MR766 ZIKV in Vero and BHK Cells, Related to Figure**  
(A) Immunohistochemical staining for ZIKV expression in Vero and BHK cells. (B) RT-qPCR analysis of Vero, BHK, microglia, BJ, 293T, and THP-1 cell supernatants. (C-E) RT-qPCR analysis of innate immune response genes *TLR3*, *IRF3*, *APOBEC* in microglia, BJ and THP-1 derived macrophages, respectively.
