# Supplementary material for: Zika virus infection reprograms global transcription of host cells to allow sustained infection
Source: PubMed Central journal article supplement (PMC5457678; doi:10.1038/emi.2017.9), 2017-04-26
Supplement: emi20179x2.pdf [file emi20179x2.pdf]

**Figure S2****A** Response to virus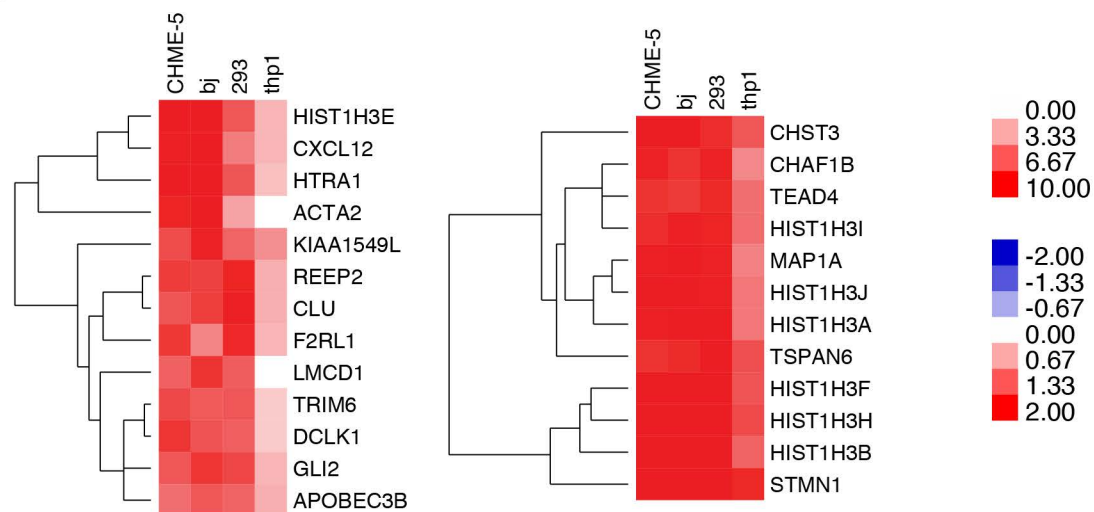**B** Modulation by virus of host gene expression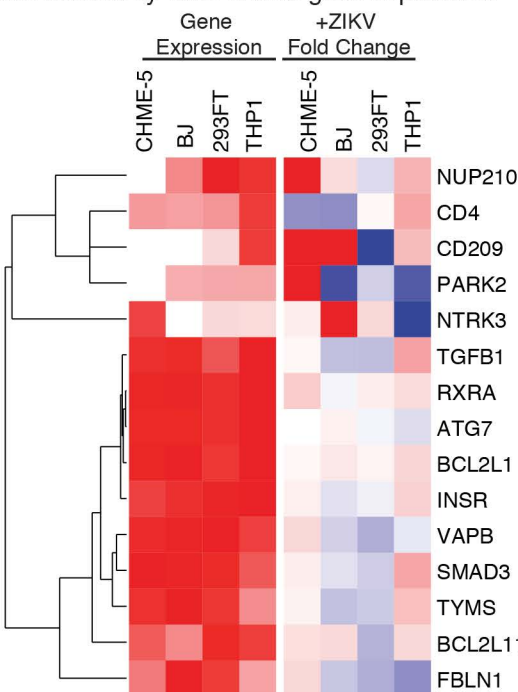**C** Viral transcription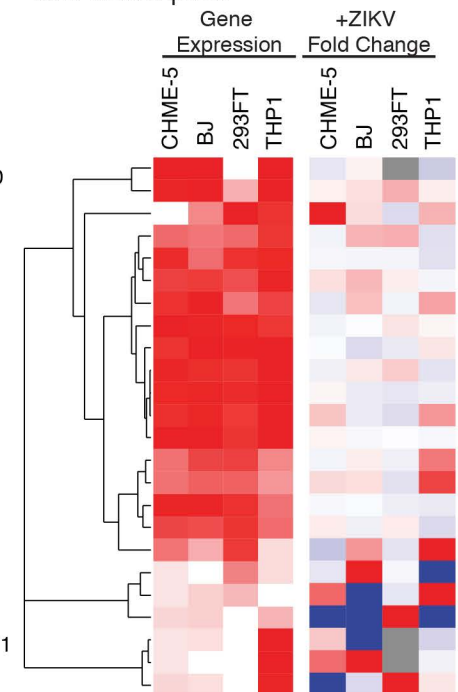**D** Viral release from host cell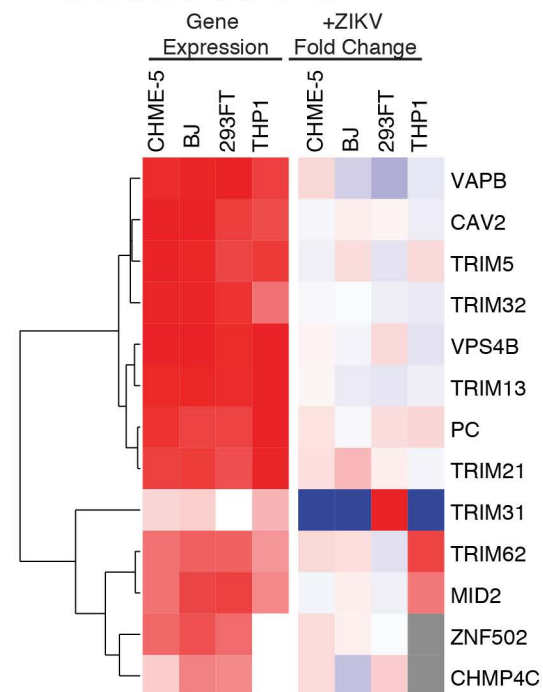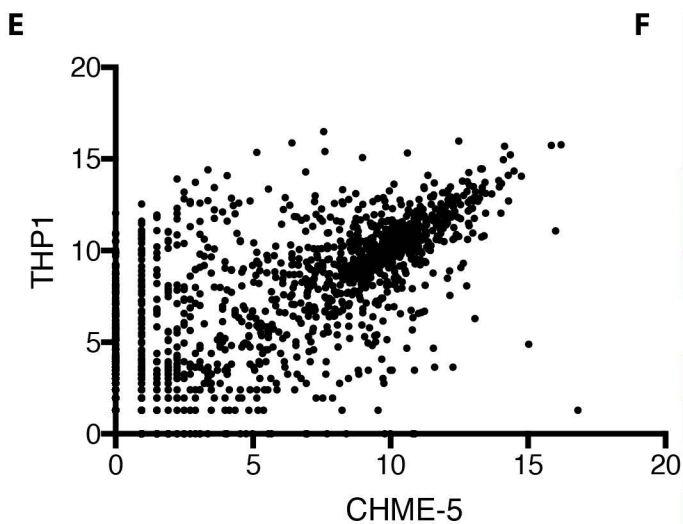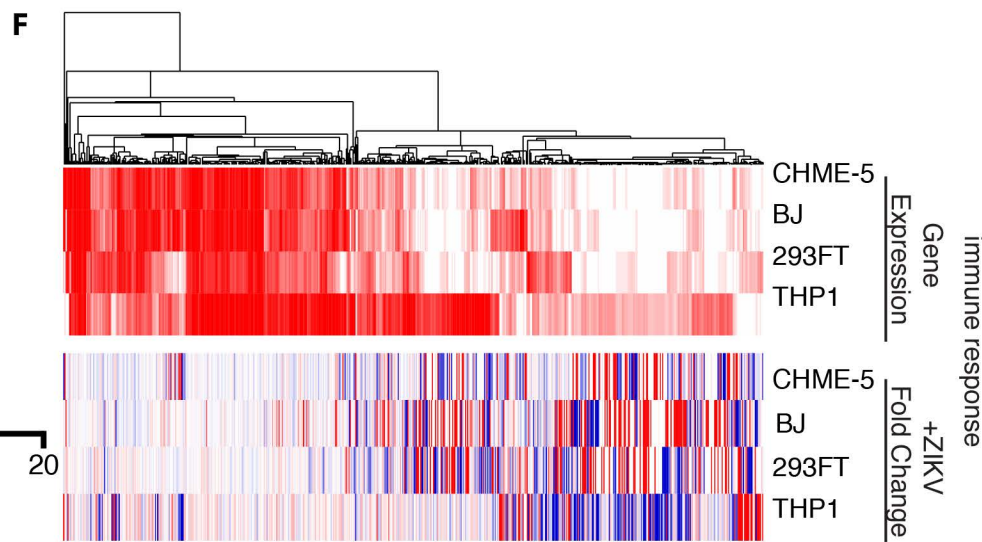

**Figure S2 Analysis of Viral Response and Immune-Related Genes Reveals Potential Antiviral Targets, Related to Figure 3**

(A) Heat map of genes highly expressed in microglia, BJ, and 293T cells, but not in THP-1 derived macrophages, from the analysis of “response to virus”-associated genes in Figure 3A. Left scale bar: 0:10 represents gene expression  $\log_2(\text{RPKM}+1)$  for all cell times. Right scale bar: -2:2 represents fold change in gene expressed between mock treated and ZIKV infected cells.

(B–D) Hierarchical clustering of differentially expressed genes related to “modulation by virus of host gene expression” (B), “viral transcription” (C), and “viral release from host cell” (D) between mock-infected cells (left) and their associated fold change in expression after ZIKV infection (right).

(E) Scatterplot of immune response genes showing higher expression of immune-related genes in THP-1 derived macrophages compared with microglia cells.

(F) Hierarchical clustering of differentially expressed genes related to “immune response” in mock-infected cells (top) and their associated fold change in expression after ZIKV infection (bottom). Also see Table 2.
