# Supplementary material for: Zika virus infection reprograms global transcription of host cells to allow sustained infection
Source: PubMed Central journal article supplement (PMC5457678; doi:10.1038/emi.2017.9), 2017-04-26
Supplement: emi20179x3.pdf [file emi20179x3.pdf]

Figure S3

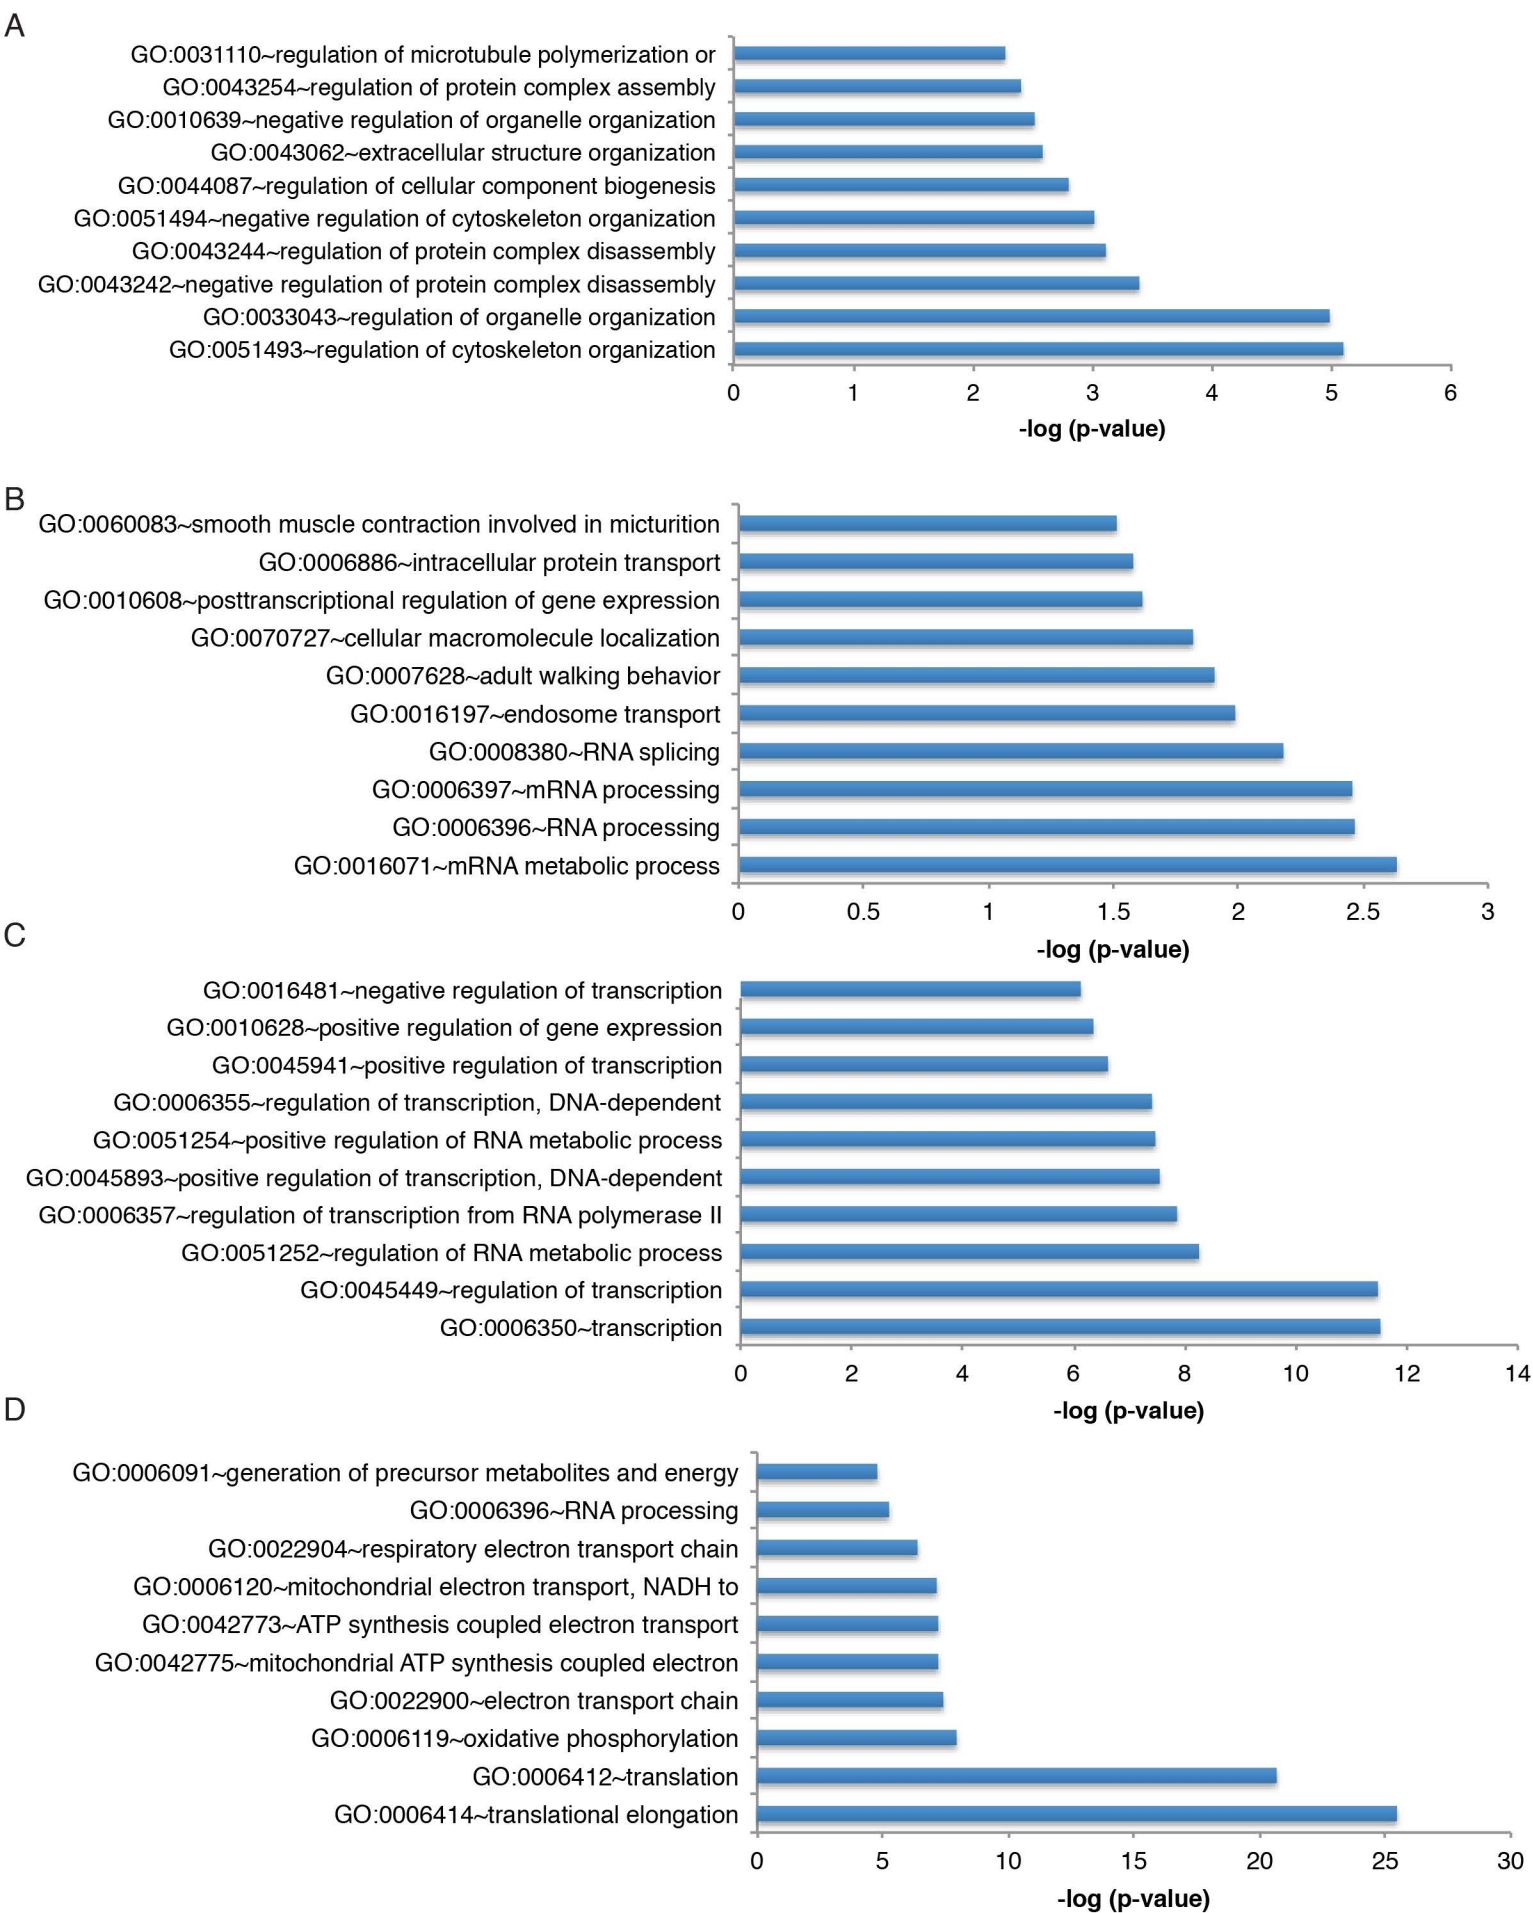

**Figure S3 Gene ontology analysis of differentially expressed genes in microglia (A), BJ (B), 293FT (C), and THP-1 (D) cells, Related to Figure 4**
